# Supplementary material
Source: PubMed Central journal article supplement (PMC2772784)
Supplement: supp_83_21_11027__1.pdf [file supp_83_21_11027__1.pdf]

Supplemental Table 1. Average number of secondary mutations

| Gag  | Protease Profile | Mean P-P | Mean P-A | PP - PA | P-value |
|------|------------------|----------|----------|---------|---------|
| A431 | D30N             | 4.6      | 2.0      | 2.6     | 1.7E-03 |
|      | D30N/N88D        | 5.4      | 3.8      | 1.6     | 0.0E+00 |
|      | I50L             | 5.5      | 3.5      | 2.0     | 1.5E-10 |
|      | I50V             | 7.8      | 6.8      | 1.0     | 4.7E-04 |
|      | V82A             | 6.7      | 6.5      | 0.3     | 3.8E-04 |
|      | V82A/L90M        | 7.5      | 7.5      | 0.1     | 1.9E-01 |
|      | I84V             | 7.3      | 6.6      | 0.8     | 0.0E+00 |
|      | I84V/L90M        | 7.7      | 7.0      | 0.7     | 0.0E+00 |
|      | N88D             | 5.5      | 3.9      | 1.6     | 0.0E+00 |
|      | N88D/L90M        | 7.3      | 5.9      | 1.5     | 4.0E-08 |
|      | L90M             | 6.8      | 4.0      | 2.8     | 0.0E+00 |
| K436 | D30N             | 1.6      | 2.2      | -0.6    | 2.5E-01 |
|      | D30N/N88D        | 4.3      | 4.0      | 0.3     | 1.8E-01 |
|      | I50L             | 5.4      | 4.2      | 1.1     | 2.6E-02 |
|      | I50V             | 7.4      | 6.9      | 0.5     | 1.4E-01 |
|      | V82A             | 6.5      | 6.6      | -0.1    | 2.4E-01 |
|      | V82A/L90M        | 7.3      | 7.5      | -0.2    | 4.4E-02 |
|      | I84V             | 7.1      | 6.9      | 0.1     | 1.0E-01 |
|      | I84V/L90M        | 7.5      | 7.4      | 0.2     | 1.2E-01 |
|      | N88D             | 4.3      | 4.1      | 0.2     | 2.1E-01 |
|      | N88D/L90M        | 5.4      | 6.2      | -0.8    | 3.2E-01 |
|      | L90M             | 5.9      | 4.4      | 1.4     | 2.2E-16 |
| I437 | D30N             | 1.9      | 2.1      | -0.2    | 6.4E-01 |
|      | D30N/N88D        | 4.3      | 4.0      | 0.3     | 2.5E-01 |
|      | I50L             | 4.8      | 4.2      | 0.6     | 3.3E-01 |
|      | I50V             | 7.8      | 6.7      | 1.1     | 3.8E-07 |
|      | V82A             | 7.0      | 6.5      | 0.4     | 1.7E-08 |
|      | V82A/L90M        | 7.7      | 7.4      | 0.3     | 2.7E-03 |
|      | I84V             | 7.2      | 7.0      | 0.2     | 7.0E-05 |
|      | I84V/L90M        | 7.8      | 7.3      | 0.5     | 4.1E-08 |
|      | N88D             | 4.5      | 4.1      | 0.4     | 1.1E-01 |
|      | N88D/L90M        | 6.6      | 6.1      | 0.5     | 1.8E-01 |
|      | L90M             | 6.1      | 4.4      | 1.8     | 0.0E+00 |

|      |           |     |     |      |         |
|------|-----------|-----|-----|------|---------|
| L449 | D30N      | 2.4 | 2.1 | 0.2  | 8.2E-01 |
|      | D30N/N88D | 4.2 | 3.9 | 0.3  | 3.0E-01 |
|      | I50L      | 3.8 | 4.3 | -0.5 | 1.1E-01 |
|      | I50V      | 6.5 | 7.2 | -0.7 | 4.2E-06 |
|      | V82A      | 7.1 | 6.5 | 0.6  | 1.3E-08 |
|      | V82A/L90M | 8.1 | 7.4 | 0.7  | 1.7E-09 |
|      | I84V      | 6.7 | 7.1 | -0.4 | 1.8E-08 |
|      | I84V/L90M | 7.4 | 7.3 | 0.0  | 5.7E-01 |
|      | N88D      | 4.3 | 4.0 | 0.3  | 7.9E-02 |
|      | N88D/L90M | 6.3 | 6.0 | 0.3  | 1.4E-01 |
|      | L90M      | 5.2 | 4.5 | 0.7  | 7.2E-07 |
| S451 | D30N      | 2.3 | 2.1 | 0.2  | 7.0E-01 |
|      | D30N/N88D | 4.0 | 4.1 | -0.1 | 3.1E-01 |
|      | I50L      | 3.9 | 4.3 | -0.4 | 2.6E-01 |
|      | I50V      | 7.4 | 6.9 | 0.5  | 3.0E-02 |
|      | V82A      | 6.5 | 6.6 | -0.1 | 8.3E-01 |
|      | V82A/L90M | 7.7 | 7.5 | 0.2  | 6.0E-03 |
|      | I84V      | 6.8 | 7.0 | -0.1 | 2.8E-02 |
|      | I84V/L90M | 7.3 | 7.4 | -0.1 | 1.5E-01 |
|      | N88D      | 4.0 | 4.2 | -0.2 | 9.2E-02 |
|      | N88D/L90M | 6.1 | 6.2 | -0.1 | 9.2E-01 |
|      | L90M      | 4.8 | 4.6 | 0.3  | 2.2E-02 |
| R452 | D30N      | 2.7 | 2.1 | 0.6  | 4.8E-01 |
|      | D30N/N88D | 4.4 | 4.0 | 0.4  | 4.2E-03 |
|      | I50L      | 4.9 | 4.2 | 0.6  | 3.5E-01 |
|      | I50V      | 7.4 | 6.9 | 0.5  | 1.1E-01 |
|      | V82A      | 7.4 | 6.6 | 0.8  | 1.2E-04 |
|      | V82A/L90M | 7.9 | 7.5 | 0.4  | 4.2E-02 |
|      | I84V      | 7.4 | 6.9 | 0.5  | 7.7E-12 |
|      | I84V/L90M | 7.7 | 7.3 | 0.4  | 3.0E-07 |
|      | N88D      | 4.4 | 4.1 | 0.4  | 1.4E-02 |
|      | N88D/L90M | 6.4 | 6.1 | 0.3  | 3.2E-01 |
|      | L90M      | 5.6 | 4.5 | 1.0  | 3.1E-03 |
| P453 | D30N      | 2.4 | 2.1 | 0.3  | 4.7E-01 |
|      | D30N/N88D | 4.1 | 4.0 | 0.1  | 8.9E-02 |
|      | I50L      | 4.0 | 4.3 | -0.3 | 3.4E-01 |
|      | I50V      | 6.9 | 6.9 | 0.0  | 9.8E-01 |
|      | V82A      | 7.0 | 6.5 | 0.6  | 2.0E-13 |
|      | V82A/L90M | 7.8 | 7.4 | 0.4  | 4.4E-07 |
|      | I84V      | 7.0 | 7.0 | 0.0  | 8.9E-01 |
|      | I84V/L90M | 7.4 | 7.4 | 0.0  | 6.4E-01 |
|      | N88D      | 4.2 | 4.1 | 0.1  | 2.5E-01 |
|      | N88D/L90M | 6.4 | 5.8 | 0.6  | 2.1E-02 |
|      | L90M      | 5.3 | 4.3 | 1.0  | 0.0E+00 |

P-P -- Samples with specified mutations present in both the protease and the cleavage site

P-A -- Samples with specified mutations present in the protease but absent the in cleavage site

p-values < 0.05 are significant
