# Supplementary material
Source: PubMed Central journal article supplement (PMC2772784)
Supplement: supp_83_21_11027__2.pdf [file supp_83_21_11027__2.pdf]

Supplemental Table 2 . Replicative Capacities for associating mutations within the protease and NC-p1 and p1-p6 cleavage sites

| Protease Mutations | Gag  | P-P | P-A | Mean P-P | Mean P-A | Median P-P | Median P-A | Std dev P-P | Std dev P-A | p-value |
|--------------------|------|-----|-----|----------|----------|------------|------------|-------------|-------------|---------|
| D30N               | A431 | 4   | 118 | 32.9     | 46.0     | 27.3       | 39.0       | 24.7        | 38.3        | 1.0E+00 |
|                    | K436 | 3   | 120 | 30.4     | 45.3     | 38.7       | 35.2       | 16.5        | 38.3        | 1.0E+00 |
|                    | I437 | 8   | 114 | 26.6     | 46.8     | 29.2       | 39.5       | 23.4        | 38.5        | 1.0E+00 |
|                    | L449 | 8   | 111 | 49.6     | 44.1     | 48.0       | 34.9       | 26.5        | 38.8        | 1.0E+00 |
|                    | S451 | 32  | 84  | 35.3     | 49.1     | 32.6       | 39.5       | 29.5        | 40.8        | 1.0E+00 |
|                    | R452 | 7   | 111 | 43.1     | 45.2     | 59.2       | 34.9       | 34.1        | 38.4        | 1.0E+00 |
|                    | P453 | 39  | 70  | 45.0     | 42.8     | 38.6       | 37.1       | 36.8        | 34.1        | 1.0E+00 |
| D30N/N88D          | A431 | 122 | 852 | 65.1     | 70.3     | 61.2       | 61.2       | 43.3        | 48.4        | 1.0E+00 |
|                    | K436 | 14  | 954 | 69.6     | 69.7     | 64.3       | 61.7       | 54.1        | 47.2        | 1.0E+00 |
|                    | I437 | 80  | 882 | 73.9     | 69.5     | 56.8       | 62.0       | 55.4        | 46.6        | 1.0E+00 |
|                    | L449 | 296 | 649 | 68.4     | 70.0     | 61.2       | 61.7       | 47.1        | 47.3        | 1.0E+00 |
|                    | S451 | 272 | 622 | 70.2     | 68.3     | 63.7       | 59.0       | 46.5        | 48.7        | 1.0E+00 |
|                    | R452 | 124 | 808 | 64.8     | 70.0     | 57.4       | 62.0       | 46.9        | 47.0        | 1.0E+00 |
|                    | P453 | 590 | 312 | 70.9     | 65.4     | 61.3       | 60.7       | 48.5        | 43.6        | 1.0E+00 |
| D30N/N88D/L90M     | K436 | 37  | 125 | 64.9     | 75.1     | 67.2       | 70.6       | 30.4        | 49.3        | 1.0E+00 |
|                    | I437 | 4   | 163 | 55.1     | 73.7     | 57.2       | 68.1       | 44.0        | 46.7        | 1.0E+00 |
|                    | L449 | 19  | 146 | 80.3     | 72.1     | 77.8       | 68.0       | 58.4        | 45.2        | 1.0E+00 |
|                    | S451 | 67  | 93  | 72.0     | 70.2     | 69.4       | 59.7       | 41.9        | 48.4        | 1.0E+00 |
|                    | R452 | 44  | 110 | 64.9     | 73.9     | 56.9       | 68.0       | 40.8        | 47.6        | 1.0E+00 |
|                    | P453 | 27  | 128 | 55.3     | 72.5     | 45.0       | 70.7       | 38.4        | 45.1        | 1.0E+00 |
|                    | A431 | 103 | 55  | 67.6     | 76.3     | 54.1       | 70.6       | 46.4        | 46.4        | 1.0E+00 |
| I50L               | A431 | 58  | 81  | 32.9     | 29.6     | 26.0       | 23.2       | 29.2        | 25.0        | 1.0E+00 |
|                    | K436 | 14  | 123 | 19.8     | 30.6     | 10.3       | 25.9       | 30.3        | 24.8        | 1.0E+00 |
|                    | I437 | 13  | 135 | 28.1     | 30.7     | 23.3       | 58.0       | 26.4        | 48.0        | 1.0E+00 |
|                    | L449 | 26  | 124 | 25.4     | 32.6     | 27.2       | 24.0       | 19.5        | 27.7        | 1.0E+00 |
|                    | S451 | 16  | 128 | 28.9     | 31.6     | 20.2       | 25.8       | 21.8        | 27.2        | 1.0E+00 |
|                    | R452 | 5   | 148 | 45.3     | 30.4     | 47.9       | 23.3       | 29.4        | 26.3        | 1.0E+00 |
|                    | P453 | 40  | 112 | 27.2     | 32.2     | 22.4       | 25.4       | 22.2        | 27.8        | 1.0E+00 |

|           |      |      |      |      |      |      |      |      |         |         |
|-----------|------|------|------|------|------|------|------|------|---------|---------|
| I50V      | A431 | 56   | 485  | 37.4 | 50.9 | 33.5 | 45.2 | 30.7 | 37.2    | 4.3E-01 |
|           | K436 | 60   | 455  | 55.8 | 48.6 | 53.5 | 43.3 | 36.3 | 37.0    | 1.0E+00 |
|           | I437 | 104  | 428  | 49.7 | 49.3 | 47.4 | 43.2 | 34.8 | 37.1    | 1.0E+00 |
|           | L449 | 181  | 336  | 46.7 | 50.2 | 36.2 | 44.9 | 38.6 | 33.3    | 1.0E+00 |
|           | S451 | 79   | 449  | 51.5 | 48.9 | 45.1 | 43.4 | 37.6 | 36.7    | 1.0E+00 |
|           | R452 | 47   | 468  | 47.5 | 49.3 | 43.4 | 43.6 | 30.8 | 35.7    | 1.0E+00 |
|           | P453 | 295  | 195  | 49.3 | 49.5 | 43.9 | 37.9 | 34.1 | 42.2    | 1.0E+00 |
| V82A      | A431 | 1775 | 1636 | 37.9 | 46.8 | 31.3 | 38.6 | 30.5 | 35.6    | 3.1E-11 |
|           | K436 | 372  | 2952 | 41.6 | 41.9 | 33.6 | 33.7 | 33.3 | 33.1    | 1.0E+00 |
|           | I437 | 635  | 2698 | 42.4 | 41.5 | 36.0 | 33.1 | 32.7 | 33.4    | 1.0E+00 |
|           | L449 | 321  | 3041 | 40.1 | 42.1 | 32.5 | 34.0 | 32.8 | 33.2    | 1.0E+00 |
|           | S451 | 487  | 2831 | 44.4 | 41.5 | 37.0 | 33.3 | 33.5 | 33.2    | 1.0E+00 |
|           | R452 | 75   | 3404 | 36.1 | 42.3 | 29.6 | 34.5 | 32.6 | 33.3    | 1.0E+00 |
| P453      | 759  | 2495 | 38.9 | 43.4 | 32.0 | 35.5 | 31.8 | 33.8 | 8.1E-02 |         |
| V82A/L90M | A431 | 871  | 1039 | 38.8 | 46.9 | 32.2 | 39.0 | 30.5 | 35.6    | 1.3E-04 |
|           | K436 | 227  | 1628 | 43.7 | 42.9 | 36.2 | 34.7 | 33.7 | 33.3    | 1.0E+00 |
|           | I437 | 378  | 1475 | 43.1 | 42.7 | 36.4 | 34.2 | 33.3 | 33.6    | 1.0E+00 |
|           | L449 | 179  | 1690 | 40.1 | 43.2 | 32.4 | 35.6 | 31.6 | 33.4    | 1.0E+00 |
|           | S451 | 247  | 1605 | 45.9 | 42.3 | 37.0 | 34.7 | 33.8 | 33.3    | 1.0E+00 |
|           | R452 | 55   | 1884 | 34.0 | 43.4 | 29.5 | 35.9 | 32.1 | 33.5    | 1.0E+00 |
|           | P453 | 465  | 1343 | 38.6 | 45.1 | 32.5 | 36.9 | 30.3 | 34.6    | 6.6E-02 |
| N88D      | A431 | 138  | 954  | 59.4 | 67.5 | 53.7 | 57.0 | 44.0 | 48.5    | 1.0E+00 |
|           | K436 | 15   | 1068 | 66.1 | 66.5 | 50.2 | 57.2 | 54.0 | 47.6    | 1.0E+00 |
|           | I437 | 87   | 989  | 69.5 | 66.4 | 54.6 | 57.7 | 55.3 | 47.1    | 1.0E+00 |
|           | L449 | 320  | 739  | 65.7 | 66.4 | 57.6 | 56.7 | 47.4 | 47.8    | 1.0E+00 |
|           | S451 | 295  | 709  | 68.4 | 64.0 | 59.7 | 53.2 | 46.0 | 48.9    | 1.0E+00 |
|           | R452 | 136  | 910  | 63.1 | 66.6 | 55.0 | 57.4 | 47.1 | 47.5    | 1.0E+00 |
|           | P453 | 646  | 361  | 68.3 | 61.7 | 57.6 | 56.5 | 49.3 | 43.0    | 1.0E+00 |

|           |      |      |      |      |      |      |      |      |         |           |
|-----------|------|------|------|------|------|------|------|------|---------|-----------|
| N88D/L90M | A431 | 48   | 181  | 54.3 | 63.8 | 55.9 | 50.6 | 34.4 | 48.8    | 1.0E+00   |
|           | K436 | 4    | 229  | 55.1 | 62.4 | 57.2 | 50.6 | 44.0 | 47.1    | 1.0E+00   |
|           | I437 | 24   | 204  | 67.8 | 61.9 | 48.8 | 50.8 | 57.5 | 45.9    | 1.0E+00   |
|           | L449 | 86   | 139  | 64.4 | 57.8 | 59.4 | 46.3 | 44.4 | 47.0    | 1.0E+00   |
|           | S451 | 56   | 162  | 59.7 | 60.4 | 51.8 | 48.2 | 41.0 | 47.6    | 1.0E+00   |
|           | R452 | 32   | 188  | 51.4 | 60.8 | 44.6 | 50.8 | 38.8 | 45.6    | 1.0E+00   |
|           | P453 | 134  | 86   | 60.4 | 62.0 | 46.3 | 54.0 | 47.1 | 45.3    | 1.0E+00   |
| I84V      | A431 | 1957 | 1703 | 39.2 | 44.9 | 31.8 | 36.8 | 31.3 | 35.0    | 1.6E-04   |
|           | K436 | 229  | 3514 | 35.7 | 42.5 | 28.3 | 34.7 | 29.3 | 33.6    | 1.5E-01   |
|           | I437 | 495  | 3290 | 43.1 | 41.8 | 37.2 | 33.7 | 31.7 | 33.5    | 1.0E+00   |
|           | L449 | 1276 | 2354 | 43.5 | 40.2 | 35.3 | 33.0 | 34.3 | 32.3    | 6.5E-01   |
|           | S451 | 703  | 2970 | 42.5 | 41.4 | 33.2 | 34.1 | 35.1 | 32.5    | 1.0E+00   |
|           | R452 | 649  | 3063 | 35.6 | 43.4 | 26.9 | 35.7 | 30.3 | 33.8    | 6.6E-07   |
| I84V/L90M | P453 | 2948 | 684  | 41.7 | 42.3 | 33.9 | 34.7 | 33.3 | 33.3    | 1.0E+00   |
|           | A431 | 1439 | 1262 | 39.9 | 44.0 | 32.4 | 36.2 | 31.5 | 34.0    | 2.8E-01   |
|           | K436 | 167  | 2607 | 35.5 | 42.4 | 27.6 | 34.9 | 28.5 | 33.1    | 6.3E-01   |
|           | I437 | 347  | 2454 | 40.9 | 42.1 | 35.5 | 34.4 | 30.4 | 33.2    | 1.0E+00   |
|           | L449 | 837  | 1843 | 43.5 | 40.5 | 35.6 | 33.2 | 33.1 | 32.4    | 1.0E+00   |
|           | S451 | 491  | 2230 | 42.0 | 41.5 | 33.8 | 34.2 | 34.0 | 32.3    | 1.0E+00   |
|           | R452 | 517  | 2226 | 35.1 | 43.6 | 26.7 | 36.3 | 28.2 | 33.4    | 9.1E-06   |
| L90M      | P453 | 2255 | 444  | 41.0 | 45.2 | 33.7 | 36.1 | 32.2 | 34.9    | 1.0E+00   |
|           | A431 | 602  | 2220 | 36.7 | 60.6 | 27.6 | 49.8 | 32.1 | 46.7    | <10.0E-12 |
|           | K436 | 189  | 2584 | 47.7 | 56.1 | 35.4 | 44.7 | 40.1 | 45.2    | 1.0E+00   |
|           | I437 | 305  | 2481 | 44.4 | 56.7 | 36.0 | 45.3 | 36.1 | 45.9    | 3.9E-03   |
|           | L449 | 297  | 2494 | 48.4 | 56.6 | 39.5 | 45.0 | 39.5 | 45.5    | 8.7E-01   |
|           | S451 | 330  | 2419 | 56.0 | 54.7 | 42.8 | 43.9 | 45.5 | 44.4    | 1.0E+00   |
|           | R452 | 50   | 2795 | 47.0 | 55.7 | 37.2 | 44.3 | 35.7 | 44.9    | 1.0E+00   |
| P453      | 722  | 1902 | 49.9 | 57.3 | 38.5 | 46.5 | 42.6 | 45.5 | 2.8E-03 |           |

P-P -- Samples with specified mutations present in both the protease and the cleavage site

P-A -- Samples with specified mutations present in the protease but absent the in cleavage site

p-values < 0.05 are significant
