# Supplementary material
Source: PubMed Central journal article supplement (PMC2772784)
Supplement: supp_83_21_11027__3.pdf [file supp_83_21_11027__3.pdf]

Supplemental Table 3. Association between protease mutations and mutations within the NC-p1 and p1-p6 cleavage sites.

| Gag Residue<br>(Cleavage Site) | Gag Mutation | Protease Mutations | P-P % | A-P % | P-P  | P-A   | A-P  | A-A     | Chi2   | p-value   |
|--------------------------------|--------------|--------------------|-------|-------|------|-------|------|---------|--------|-----------|
| A431<br>(NC-p1)                | A > V        | D30N               | 3     | 19    | 4    | 141   | 6589 | 28134   | 23.7   | 1.9E-02   |
|                                |              | D30N/N88D          | 12    | 19    | 133  | 975   | 6460 | 27300   | 35.1   | 5.2E-05   |
|                                |              | D30N/N88D/L90M     | 21    | 19    | 40   | 149   | 6434 | 27141   | 0.4    | 1.0E+00   |
|                                |              | I50L               | 40    | 19    | 64   | 95    | 6738 | 29150   | 46.3   | 1.7E-07   |
|                                |              | I50V               | 10    | 19    | 63   | 538   | 7092 | 29576   | 29.3   | 1.0E-03   |
|                                |              | V82A               | 52    | 15    | 1986 | 1844  | 4722 | 26984   | 3046.1 | <10.0E-12 |
|                                |              | V82A/L90M          | 45    | 17    | 969  | 1167  | 5614 | 26624   | 1009.0 | <10.0E-12 |
|                                |              | I84V               | 53    | 14    | 2161 | 1921  | 4456 | 26551   | 3504.2 | <10.0E-12 |
|                                |              | I84V/L90M          | 53    | 16    | 1582 | 1429  | 4914 | 26030   | 2381.3 | <10.0E-12 |
|                                |              | N88D               | 12    | 19    | 149  | 1085  | 6447 | 27288   | 38.1   | 1.1E-05   |
|                                |              | N88D/L90M          | 20    | 19    | 51   | 210   | 6426 | 27167   | 0.0    | 1.0E+00   |
| L90M                           | 21           | 19                 | 669   | 2487  | 5805 | 24803 | 9.1  | 1.0E+00 |        |           |
| K436<br>(NC-p1)                | K > R        | D30N               | 3     | 6     | 5    | 140   | 2008 | 32160   | 1.1    | 1.0E+00   |
|                                |              | D30N/N88D          | 2     | 6     | 17   | 1078  | 1996 | 31222   | 37.3   | 1.7E-05   |
|                                |              | D30N/N88D/L90M     | 3     | 6     | 5    | 187   | 1970 | 31042   | 3.3    | 1.0E+00   |
|                                |              | I50L               | 10    | 6     | 16   | 142   | 2066 | 33324   | 4.5    | 1.0E+00   |
|                                |              | I50V               | 12    | 6     | 67   | 505   | 2121 | 34155   | 33.7   | 1.1E-04   |
|                                |              | V82A               | 11    | 5     | 416  | 3314  | 1641 | 29609   | 208.6  | <10.0E-12 |
|                                |              | V82A/L90M          | 12    | 6     | 252  | 1822  | 1764 | 29977   | 149.8  | <10.0E-12 |
|                                |              | I84V               | 6     | 6     | 263  | 3913  | 1765 | 28594   | 1.5    | 1.0E+00   |
|                                |              | I84V/L90M          | 6     | 6     | 192  | 2902  | 1795 | 28511   | 0.4    | 1.0E+00   |
|                                |              | N88D               | 1     | 6     | 18   | 1200  | 2000 | 31195   | 43.2   | 8.3E-07   |
|                                |              | N88D/L90M          | 2     | 6     | 5    | 258   | 1972 | 31057   | 7.0    | 1.0E+00   |
| L90M                           | 7            | 6                  | 213   | 2885  | 1762 | 28344 | 5.1  | 1.0E+00 |        |           |

|                 |       |                |     |      |      |       |      |         |        |           |
|-----------------|-------|----------------|-----|------|------|-------|------|---------|--------|-----------|
| I437<br>(NC-p1) | I > V | D30N           | 6   | 9    | 9    | 136   | 3246 | 31062   | 1.4    | 1.0E+00   |
|                 |       | D30N/N88D      | 8   | 9    | 87   | 1005  | 3168 | 30193   | 2.7    | 1.0E+00   |
|                 |       | D30N/N88D/L90M | 12  | 10   | 22   | 169   | 3160 | 29989   | 0.7    | 1.0E+00   |
|                 |       | I50L           | 8   | 9    | 14   | 156   | 3369 | 32135   | 0.2    | 1.0E+00   |
|                 |       | I50V           | 19  | 9    | 115  | 476   | 3432 | 32957   | 66.3   | 6.5E-12   |
|                 |       | V82A           | 19  | 8    | 709  | 3033  | 2619 | 28779   | 437.4  | <10.0E-12 |
|                 |       | V82A/L90M      | 20  | 9    | 423  | 1653  | 2828 | 29062   | 296.9  | <10.0E-12 |
|                 |       | I84V           | 13  | 9    | 543  | 3673  | 2730 | 27739   | 66.1   | 7.1E-12   |
|                 |       | I84V/L90M      | 12  | 9    | 381  | 2736  | 2817 | 27608   | 28.5   | 1.6E-03   |
|                 |       | N88D           | 8   | 9    | 94   | 1120  | 3165 | 30172   | 4.0    | 1.0E+00   |
|                 |       | N88D/L90M      | 10  | 10   | 27   | 232   | 3158 | 30009   | 0.1    | 1.0E+00   |
| L90M            | 11    | 9              | 336 | 2784 | 2846 | 27374 | 5.8  | 1.0E+00 |        |           |
| L449<br>(p1-p6) | L > F | D30N           | 7   | 15   | 10   | 132   | 5240 | 28699   | 7.0    | 1.0E+00   |
|                 |       | D30N/N88D      | 32  | 15   | 339  | 728   | 4911 | 28103   | 225.1  | <10.0E-12 |
|                 |       | D30N/N88D/L90M | 41  | 15   | 76   | 110   | 5053 | 27758   | 89.4   | <10.0E-12 |
|                 |       | I50L           | 17  | 15   | 30   | 143   | 5414 | 29600   | 0.3    | 1.0E+00   |
|                 |       | I50V           | 35  | 15   | 200  | 371   | 5404 | 30590   | 171.9  | <10.0E-12 |
|                 |       | V82A           | 10  | 16   | 364  | 3410  | 5014 | 25944   | 109.8  | <10.0E-12 |
|                 |       | V82A/L90M      | 10  | 16   | 200  | 1890  | 5045 | 26460   | 61.3   | 8.2E-11   |
|                 |       | I84V           | 35  | 13   | 1416 | 2634  | 3880 | 26359   | 1337.9 | <10.0E-12 |
|                 |       | I84V/L90M      | 31  | 14   | 936  | 2053  | 4231 | 25960   | 617.9  | <10.0E-12 |
|                 |       | N88D           | 31  | 15   | 365  | 824   | 4899 | 28090   | 220.0  | <10.0E-12 |
|                 |       | N88D/L90M      | 38  | 15   | 96   | 160   | 5046 | 27780   | 93.1   | <10.0E-12 |
| L90M            | 10    | 16             | 328 | 2800 | 4801 | 25068 | 66.9 | 4.7E-12 |        |           |
| S451<br>(p1-p6) | S > N | D30N           | 26  | 17   | 36   | 102   | 5571 | 27130   | 7.3    | 1.0E+00   |
|                 |       | D30N/N88D      | 30  | 17   | 299  | 710   | 5308 | 26522   | 115.1  | <10.0E-12 |
|                 |       | D30N/N88D/L90M | 28  | 17   | 50   | 127   | 5413 | 26201   | 14.5   | 1.2E-02   |
|                 |       | I50L           | 11  | 17   | 19   | 148   | 5776 | 28044   | 3.4    | 1.0E+00   |
|                 |       | I50V           | 15  | 17   | 88   | 497   | 5893 | 28827   | 1.4    | 1.0E+00   |
|                 |       | V82A           | 15  | 17   | 553  | 3174  | 5156 | 24606   | 14.3   | 1.0E+00   |
|                 |       | V82A/L90M      | 14  | 17   | 282  | 1788  | 5273 | 25041   | 19.1   | 2.0E-01   |
|                 |       | I84V           | 19  | 17   | 795  | 3309  | 4858 | 24084   | 16.8   | 7.0E-01   |
|                 |       | I84V/L90M      | 18  | 17   | 560  | 2477  | 4944 | 23991   | 3.4    | 1.0E+00   |
|                 |       | N88D           | 29  | 17   | 322  | 804   | 5310 | 26496   | 107.8  | <10.0E-12 |
|                 |       | N88D/L90M      | 25  | 17   | 62   | 183   | 5424 | 26204   | 10.8   | 1.0E+00   |
| L90M            | 12    | 18             | 373 | 2696 | 5090 | 23632 | 60.0 | 1.6E-10 |        |           |

|                 |       |                |     |      |      |       |       |         |        |           |
|-----------------|-------|----------------|-----|------|------|-------|-------|---------|--------|-----------|
| R452<br>(p1-p6) | R > S | D30N           | 6   | 4    | 9    | 131   | 1420  | 33353   | 1.4    | 1.0E+00   |
|                 |       | D30N/N88D      | 13  | 4    | 139  | 920   | 1290  | 32564   | 224.6  | <10.0E-12 |
|                 |       | D30N/N88D/L90M | 17  | 4    | 31   | 150   | 1367  | 32242   | 74.2   | <10.0E-12 |
|                 |       | I50L           | 4   | 4    | 7    | 169   | 1474  | 34478   | 0.0    | 1.0E+00   |
|                 |       | I50V           | 9   | 4    | 54   | 518   | 1455  | 35497   | 42.8   | 1.0E-06   |
|                 |       | V82A           | 2   | 4    | 87   | 3808  | 1365  | 30345   | 37.5   | 1.5E-05   |
|                 |       | V82A/L90M      | 3   | 4    | 64   | 2096  | 1354  | 30905   | 7.5    | 1.0E+00   |
|                 |       | I84V           | 17  | 2    | 724  | 3419  | 711   | 30287   | 2146.6 | <10.0E-12 |
|                 |       | I84V/L90M      | 19  | 3    | 576  | 2483  | 826   | 30102   | 1833.7 | <10.0E-12 |
|                 |       | N88D           | 13  | 4    | 151  | 1030  | 1286  | 32545   | 231.8  | <10.0E-12 |
|                 |       | N88D/L90M      | 14  | 4    | 36   | 215   | 1369  | 32257   | 63.6   | 2.6E-11   |
| L90M            | 2     | 4              | 53  | 3125 | 1345 | 29267 | 53.3  | 4.9E-09 |        |           |
| P453<br>(p1-p6) | P > L | D30N           | 33  | 31   | 42   | 86    | 10127 | 22916   | 0.2    | 1.0E+00   |
|                 |       | D30N/N88D      | 66  | 30   | 671  | 351   | 9498  | 22651   | 605.9  | <10.0E-12 |
|                 |       | D30N/N88D/L90M | 65  | 31   | 119  | 65    | 9830  | 22127   | 96.9   | <10.0E-12 |
|                 |       | I50L           | 26  | 31   | 45   | 130   | 10490 | 23407   | 2.0    | 1.0E+00   |
|                 |       | I50V           | 60  | 30   | 326  | 217   | 10574 | 24269   | 219.7  | <10.0E-12 |
|                 |       | V82A           | 24  | 32   | 861  | 2788  | 9526  | 20609   | 97.8   | <10.0E-12 |
|                 |       | V82A/L90M      | 26  | 31   | 531  | 1484  | 9612  | 21071   | 21.6   | 5.5E-02   |
|                 |       | I84V           | 81  | 24   | 3266 | 784   | 6975  | 22319   | 5397.7 | <10.0E-12 |
|                 |       | I84V/L90M      | 83  | 26   | 2507 | 503   | 7502  | 21778   | 4241.0 | <10.0E-12 |
|                 |       | N88D           | 64  | 29   | 731  | 403   | 9467  | 22657   | 629.2  | <10.0E-12 |
|                 |       | N88D/L90M      | 61  | 31   | 152  | 99    | 9823  | 22144   | 102.3  | <10.0E-12 |
| L90M            | 27    | 31             | 797 | 2127 | 9152 | 20065 | 20.4  | 1.1E-01 |        |           |

P-P -- Samples with specified mutations present in both the protease and the cleavage site

P-A -- Samples with specified mutations present in the protease but absent the in cleavage site

p-values < 0.05 are significant
