# Supplementary material
Source: PubMed Central journal article supplement (PMC2772784)
Supplement: supp_83_21_11027__4.pdf [file supp_83_21_11027__4.pdf]

Supplemental Table 4. Drug susceptibility data for associating mutations within the protease and NC-p1 and p1-p6 cleavage sites

| Protease Mutations | Gag Residue (Cleavage Site) | PI  | P-P | P-A  | Mean P-P | Mean P-A | Median P-P | Median P-A | Std dev P-P | Std dev P-A | p-value   |
|--------------------|-----------------------------|-----|-----|------|----------|----------|------------|------------|-------------|-------------|-----------|
| D30N/N88D          | A431 (NC-p1)                | APV | 133 | 975  | 4.7      | 14.2     | 2.7        | 1.1        | 38.9        | 27.1        | <10.0E-12 |
|                    |                             | ATV | 133 | 975  | 16.9     | 112.4    | 20.4       | 3.9        | 202.1       | 68.3        | <10.0E-12 |
|                    |                             | IDV | 133 | 975  | 5.2      | 26.8     | 6.2        | 2.0        | 64.1        | 26.3        | <10.0E-12 |
|                    |                             | LPV | 133 | 975  | 4.1      | 21.9     | 4.7        | 1.2        | 53.9        | 21.2        | <10.0E-12 |
|                    |                             | NFV | 133 | 975  | 117.2    | 320.7    | 199.7      | 61.8       | 243.0       | 159.9       | <10.0E-12 |
|                    |                             | RTV | 133 | 975  | 9.0      | 44.5     | 6.7        | 1.9        | 87.2        | 38.0        | <10.0E-12 |
|                    |                             | SQV | 133 | 975  | 27.3     | 196.8    | 9.1        | 2.7        | 372.1       | 135.1       | <10.0E-12 |
|                    |                             | TPV | 84  | 501  | 1.5      | 5.0      | 1.5        | 0.9        | 11.0        | 4.3         | 6.3E-07   |
| D30N/N88D          | I437 (NC-p1)                | APV | 87  | 1005 | 9.1      | 5.1      | 1.9        | 1.1        | 22.7        | 26.8        | 2.1E-05   |
|                    |                             | ATV | 87  | 1005 | 42.7     | 26.6     | 6.4        | 4.2        | 127.6       | 94.8        | 9.0E-05   |
|                    |                             | IDV | 86  | 1004 | 17.8     | 6.7      | 3.3        | 2.2        | 61.9        | 27.8        | 3.0E-06   |
|                    |                             | LPV | 87  | 1005 | 9.6      | 5.6      | 2.3        | 1.3        | 25.0        | 26.8        | 3.9E-06   |
|                    |                             | NFV | 87  | 1005 | 221.7    | 137.2    | 93.7       | 66.7       | 228.4       | 181.2       | 1.3E-04   |
|                    |                             | RTV | 87  | 1005 | 21.9     | 12.4     | 3.3        | 2.1        | 62.7        | 45.4        | 2.2E-05   |
|                    |                             | SQV | 87  | 1005 | 64.4     | 47.9     | 5.8        | 2.9        | 210.7       | 190.5       | 8.3E-05   |
|                    |                             | TPV | 45  | 526  | 5.3      | 1.7      | 1.1        | 0.9        | 13.2        | 4.4         | 1.3E-02   |
| D30N/N88D          | L449 (p1-p6)                | APV | 339 | 728  | 4.4      | 8.4      | 1.4        | 1.1        | 34.2        | 22.6        | 3.5E-05   |
|                    |                             | ATV | 339 | 728  | 23.2     | 39.4     | 4.7        | 4.2        | 120.7       | 86.8        | 1.0E+00   |
|                    |                             | IDV | 339 | 728  | 5.9      | 11.0     | 2.6        | 2.0        | 40.8        | 27.2        | 1.1E-06   |
|                    |                             | LPV | 339 | 728  | 5.6      | 6.6      | 1.5        | 1.3        | 19.3        | 25.8        | 3.4E-01   |
|                    |                             | NFV | 339 | 728  | 131.6    | 170.9    | 77.5       | 65.1       | 204.9       | 175.7       | 6.6E-02   |
|                    |                             | RTV | 339 | 728  | 12.2     | 14.9     | 2.2        | 2.1        | 47.1        | 45.7        | 1.0E+00   |
|                    |                             | SQV | 339 | 728  | 39.3     | 72.0     | 3.5        | 2.8        | 234.8       | 171.2       | 7.8E-03   |
|                    |                             | TPV | 178 | 389  | 1.7      | 2.6      | 0.9        | 0.9        | 8.0         | 4.8         | 1.0E+00   |
| D30N/N88D/L90M     | A431 (NC-p1)                | APV | 40  | 149  | 28.3     | 21.3     | 9.5        | 2.4        | 63.5        | 66.6        | 1.1E-02   |
|                    |                             | ATV | 40  | 149  | 258.2    | 52.1     | 89.3       | 13.2       | 271.1       | 120.1       | 3.8E-09   |
|                    |                             | IDV | 39  | 148  | 70.5     | 17.4     | 32.2       | 4.7        | 104.5       | 56.7        | 5.1E-10   |
|                    |                             | LPV | 40  | 149  | 45.5     | 15.5     | 26.0       | 3.5        | 80.0        | 49.0        | 3.3E-08   |
|                    |                             | NFV | 40  | 149  | 555.1    | 305.9    | 600.0      | 172.1      | 137.1       | 236.7       | 6.6E-06   |
|                    |                             | RTV | 40  | 149  | 121.4    | 38.3     | 74.5       | 12.1       | 127.1       | 79.0        | 6.9E-08   |
|                    |                             | SQV | 40  | 149  | 572.2    | 135.8    | 1000.0     | 27.7       | 459.2       | 292.7       | 3.2E-07   |
|                    |                             | TPV | 27  | 80   | 11.7     | 3.8      | 4.0        | 1.2        | 17.9        | 10.0        | 1.6E-04   |

|                |                 |     |     |     |       |       |       |       |       |       |         |
|----------------|-----------------|-----|-----|-----|-------|-------|-------|-------|-------|-------|---------|
| D30N/N88D/L90M | L449<br>(p1-p6) | APV | 76  | 110 | 25.3  | 17.9  | 3.3   | 2.7   | 67.2  | 55.1  | 1.0E+00 |
|                |                 | ATV | 76  | 110 | 103.7 | 91.6  | 30.4  | 20.4  | 188.4 | 182.6 | 1.0E+00 |
|                |                 | IDV | 75  | 109 | 35.5  | 23.3  | 7.7   | 5.2   | 80.8  | 66.7  | 1.0E+00 |
|                |                 | LPV | 76  | 110 | 20.6  | 18.7  | 6.6   | 4.2   | 36.6  | 52.6  | 1.0E+00 |
|                |                 | NFV | 76  | 110 | 391.4 | 341.0 | 600.0 | 214.8 | 242.6 | 241.2 | 1.0E+00 |
|                |                 | RTV | 76  | 110 | 51.9  | 56.8  | 27.8  | 18.3  | 88.6  | 98.8  | 1.0E+00 |
|                |                 | SQV | 76  | 110 | 263.7 | 217.7 | 43.1  | 35.2  | 401.4 | 373.0 | 1.0E+00 |
|                |                 | TPV | 44  | 64  | 6.7   | 5.1   | 1.2   | 1.7   | 15.0  | 11.1  | 1.0E+00 |
| D30N/N88D/L90M | S451<br>(p1-p6) | APV | 50  | 127 | 17.5  | 20.5  | 2.6   | 3.9   | 57.6  | 53.6  | 1.0E+00 |
|                |                 | ATV | 50  | 127 | 101.7 | 96.6  | 20.1  | 26.2  | 176.3 | 186.8 | 1.0E+00 |
|                |                 | IDV | 49  | 127 | 25.0  | 31.6  | 6.5   | 6.5   | 60.8  | 79.2  | 1.0E+00 |
|                |                 | LPV | 50  | 127 | 25.6  | 17.3  | 4.1   | 6.4   | 73.8  | 31.7  | 1.0E+00 |
|                |                 | NFV | 50  | 127 | 343.7 | 372.3 | 205.5 | 600.0 | 241.9 | 244.8 | 1.0E+00 |
|                |                 | RTV | 50  | 127 | 65.1  | 53.0  | 18.9  | 20.5  | 99.7  | 95.6  | 1.0E+00 |
|                |                 | SQV | 50  | 127 | 262.7 | 223.2 | 42.1  | 34.4  | 399.3 | 379.0 | 1.0E+00 |
|                |                 | TPV | 25  | 77  | 4.9   | 6.5   | 1.2   | 1.6   | 10.9  | 13.8  | 1.0E+00 |
| D30N/N88D/L90M | R452<br>(p1-p6) | APV | 31  | 150 | 44.0  | 18.9  | 8.0   | 2.8   | 99.6  | 57.9  | 1.0E+00 |
|                |                 | ATV | 31  | 150 | 210.1 | 73.7  | 58.0  | 16.7  | 296.0 | 146.5 | 1.0E+00 |
|                |                 | IDV | 31  | 148 | 96.8  | 14.4  | 20.6  | 5.0   | 154.8 | 22.7  | 1.0E+00 |
|                |                 | LPV | 31  | 150 | 56.7  | 15.2  | 18.4  | 4.5   | 99.5  | 44.1  | 1.0E+00 |
|                |                 | NFV | 31  | 150 | 424.9 | 339.9 | 600.0 | 219.5 | 241.3 | 241.3 | 1.0E+00 |
|                |                 | RTV | 31  | 150 | 120.5 | 42.1  | 43.4  | 17.2  | 158.1 | 70.9  | 1.0E+00 |
|                |                 | SQV | 31  | 150 | 301.4 | 215.0 | 59.1  | 33.1  | 421.3 | 371.9 | 1.0E+00 |
|                |                 | TPV | 18  | 82  | 22.6  | 2.3   | 4.0   | 1.3   | 25.0  | 3.0   | 6.5E-02 |
| D30N/N88D/L90M | P453<br>(p1-p6) | ATV | 119 | 65  | 111.0 | 72.5  | 31.6  | 15.7  | 200.7 | 153.3 | 1.0E+00 |
|                |                 | APV | 119 | 65  | 26.1  | 17.9  | 3.2   | 2.9   | 73.4  | 52.5  | 1.0E+00 |
|                |                 | IDV | 118 | 64  | 39.0  | 10.2  | 6.8   | 6.0   | 89.2  | 10.1  | 1.0E+00 |
|                |                 | LPV | 119 | 65  | 27.7  | 12.1  | 6.8   | 3.7   | 70.8  | 22.0  | 1.0E+00 |
|                |                 | NFV | 119 | 65  | 372.5 | 338.4 | 600.0 | 215.6 | 241.4 | 240.9 | 1.0E+00 |
|                |                 | RTV | 119 | 65  | 63.5  | 43.1  | 22.2  | 17.8  | 107.5 | 77.5  | 1.0E+00 |
|                |                 | SQV | 119 | 65  | 272.0 | 142.8 | 39.8  | 33.6  | 408.2 | 302.3 | 1.0E+00 |
|                |                 | TPV | 75  | 34  | 7.4   | 2.1   | 1.6   | 1.1   | 14.9  | 3.7   | 5.2E-01 |
| 150V           | K436<br>(NC-p1) | APV | 67  | 505 | 108.1 | 97.5  | 55.0  | 47.4  | 125.7 | 126.4 | 1.0E+00 |
|                |                 | ATV | 67  | 505 | 48.9  | 27.9  | 16.1  | 6.8   | 74.4  | 80.9  | 9.7E-02 |
|                |                 | IDV | 67  | 505 | 96.4  | 37.2  | 32.5  | 10.1  | 134.2 | 80.7  | 1.5E-03 |
|                |                 | LPV | 67  | 505 | 273.4 | 171.3 | 199.6 | 106.3 | 200.0 | 179.1 | 5.7E-03 |
|                |                 | NFV | 67  | 505 | 93.1  | 40.1  | 36.7  | 14.6  | 154.9 | 76.6  | 3.9E-02 |
|                |                 | RTV | 67  | 505 | 275.9 | 204.1 | 400.0 | 131.5 | 157.6 | 175.1 | 1.3E-01 |
|                |                 | SQV | 67  | 505 | 453.5 | 244.0 | 103.2 | 14.1  | 482.7 | 408.2 | 4.7E-02 |
|                |                 | TPV | 48  | 325 | 1.4   | 1.5   | 0.9   | 0.7   | 1.6   | 4.3   | 1.0E+00 |

|      |                 |     |      |      |       |       |       |       |       |       |           |
|------|-----------------|-----|------|------|-------|-------|-------|-------|-------|-------|-----------|
| 150V | I437<br>(NC-p1) | APV | 115  | 476  | 124.0 | 87.7  | 71.4  | 43.9  | 133.2 | 117.7 | 5.2E-05   |
|      |                 | ATV | 115  | 476  | 65.7  | 19.1  | 29.5  | 5.5   | 119.7 | 52.2  | <10.0E-12 |
|      |                 | IDV | 115  | 468  | 119.8 | 24.7  | 47.3  | 8.8   | 151.1 | 51.4  | <10.0E-12 |
|      |                 | LPV | 115  | 476  | 286.4 | 156.2 | 233.4 | 96.0  | 196.5 | 169.0 | 1.2E-10   |
|      |                 | NFV | 115  | 476  | 104.4 | 30.2  | 56.1  | 13.6  | 156.7 | 48.4  | <10.0E-12 |
|      |                 | RTV | 115  | 476  | 305.0 | 191.4 | 400.0 | 106.6 | 147.5 | 173.3 | 2.6E-10   |
|      |                 | SQV | 115  | 476  | 516.7 | 197.6 | 169.2 | 11.1  | 482.5 | 374.1 | <10.0E-12 |
|      |                 | TPV | 68   | 313  | 2.4   | 1.2   | 1.1   | 0.6   | 6.5   | 3.2   | 8.5E-04   |
| 150V | L449<br>(p1-p6) | APV | 200  | 371  | 93.0  | 100.2 | 43.4  | 52.7  | 125.8 | 123.8 | 1.0E+00   |
|      |                 | ATV | 200  | 371  | 25.4  | 31.9  | 5.4   | 7.9   | 74.1  | 82.5  | 1.0E+00   |
|      |                 | IDV | 200  | 371  | 30.8  | 51.5  | 7.0   | 13.3  | 70.8  | 100.7 | 3.7E-03   |
|      |                 | LPV | 200  | 371  | 147.4 | 200.6 | 65.4  | 132.3 | 180.4 | 180.2 | 7.9E-04   |
|      |                 | NFV | 200  | 371  | 33.7  | 52.2  | 12.7  | 18.7  | 59.6  | 102.4 | 1.0E+00   |
|      |                 | RTV | 200  | 371  | 163.3 | 241.5 | 77.3  | 400.0 | 166.7 | 171.1 | 4.4E-05   |
|      |                 | SQV | 200  | 371  | 193.7 | 297.1 | 10.6  | 19.7  | 368.4 | 437.9 | 1.0E+00   |
|      |                 | TPV | 130  | 242  | 1.5   | 1.4   | 0.6   | 0.7   | 4.8   | 3.6   | 1.0E+00   |
| 150L | A431<br>(NC-p1) | APV | 62   | 94   | 5.5   | 2.0   | 2.6   | 1.0   | 9.5   | 2.8   | 9.3E-04   |
|      |                 | ATV | 62   | 94   | 123.4 | 42.8  | 71.5  | 22.8  | 166.6 | 76.5  | 8.5E-05   |
|      |                 | IDV | 62   | 94   | 3.9   | 1.3   | 1.8   | 0.7   | 6.7   | 2.5   | 5.9E-06   |
|      |                 | LPV | 62   | 94   | 4.8   | 0.9   | 1.6   | 0.5   | 10.4  | 1.6   | 2.4E-04   |
|      |                 | NFV | 62   | 94   | 9.9   | 3.5   | 4.3   | 1.6   | 17.5  | 4.9   | 1.9E-04   |
|      |                 | RTV | 62   | 94   | 9.0   | 1.9   | 2.5   | 0.8   | 14.2  | 3.2   | 4.3E-03   |
|      |                 | SQV | 62   | 94   | 3.1   | 1.6   | 1.1   | 0.7   | 6.1   | 2.3   | 1.0E+00   |
|      |                 | TPV | 45   | 60   | 2.5   | 1.3   | 1.2   | 0.7   | 4.7   | 1.8   | 1.0E+00   |
| V82A | A431<br>(NC-p1) | APV | 1986 | 1841 | 31.6  | 28.9  | 9.3   | 8.7   | 64.2  | 66.9  | 1.0E+00   |
|      |                 | ATV | 1986 | 1841 | 74.6  | 64.0  | 19.4  | 20.0  | 125.2 | 144.0 | 1.0E+00   |
|      |                 | IDV | 1986 | 1841 | 41.4  | 47.9  | 26.6  | 20.1  | 70.1  | 70.2  | 1.1E-12   |
|      |                 | LPV | 1986 | 1841 | 90.4  | 102.2 | 64.8  | 45.6  | 117.5 | 121.7 | 1.1E-12   |
|      |                 | NFV | 1986 | 1841 | 65.9  | 68.5  | 36.3  | 31.0  | 102.2 | 105.7 | 2.5E-01   |
|      |                 | RTV | 1986 | 1841 | 201.1 | 184.1 | 101.2 | 120.8 | 163.1 | 171.1 | 1.0E+00   |
|      |                 | SQV | 1986 | 1841 | 96.6  | 65.6  | 9.0   | 9.9   | 207.3 | 257.7 | 1.0E+00   |
|      |                 | TPV | 1243 | 1109 | 4.4   | 2.9   | 1.6   | 2.2   | 4.4   | 6.6   | <10.0E-12 |
| V82A | I437<br>(NC-p1) | APV | 709  | 3033 | 37.4  | 28.7  | 14.3  | 8.4   | 71.9  | 64.8  | <10.0E-12 |
|      |                 | ATV | 708  | 3031 | 109.3 | 58.0  | 38.7  | 16.6  | 176.2 | 118.8 | <10.0E-12 |
|      |                 | IDV | 699  | 3010 | 64.5  | 40.5  | 33.7  | 21.5  | 91.8  | 64.5  | <10.0E-12 |
|      |                 | LPV | 709  | 3033 | 130.2 | 89.1  | 83.3  | 51.7  | 143.6 | 114.1 | <10.0E-12 |
|      |                 | NFV | 709  | 3033 | 97.2  | 59.2  | 51.7  | 30.5  | 135.9 | 92.9  | <10.0E-12 |
|      |                 | RTV | 709  | 3033 | 237.6 | 178.7 | 342.7 | 93.2  | 167.3 | 164.8 | <10.0E-12 |
|      |                 | SQV | 709  | 3033 | 147.6 | 63.9  | 16.2  | 7.9   | 321.1 | 204.0 | <10.0E-12 |
|      |                 | TPV | 460  | 1840 | 5.2   | 3.2   | 2.7   | 1.7   | 7.7   | 5.0   | <10.0E-12 |
| V82A | L449            | APV | 364  | 3407 | 29.1  | 37.1  | 14.5  | 8.6   | 68.2  | 65.5  | 6.8E-06   |
|      |                 | ATV | 364  | 3407 | 62.7  | 99.7  | 39.5  | 17.4  | 152.4 | 127.4 | 4.8E-10   |
|      |                 | IDV | 364  | 3407 | 40.0  | 75.5  | 37.9  | 22.1  | 107.7 | 61.6  | 1.2E-10   |
|      |                 | LPV | 364  | 3407 | 91.0  | 129.0 | 84.3  | 52.9  | 137.4 | 115.9 | 3.9E-09   |

|           |                 |         |      |       |       |       |       |       |       |           |
|-----------|-----------------|---------|------|-------|-------|-------|-------|-------|-------|-----------|
| V82A      | (p1-p6)         | NFV 364 | 3407 | 59.8  | 119.1 | 59.0  | 30.9  | 163.5 | 91.9  | <10.0E-12 |
|           |                 | RTV 364 | 3407 | 182.6 | 243.4 | 400.0 | 96.1  | 169.3 | 165.5 | 1.6E-07   |
|           |                 | SQV 364 | 3407 | 69.0  | 160.9 | 24.6  | 8.3   | 326.8 | 214.4 | <10.0E-12 |
|           |                 | TPV 237 | 2063 | 3.4   | 4.4   | 2.6   | 1.8   | 5.3   | 5.5   | 1.1E-04   |
| V82A      | P453<br>(p1-p6) | APV 861 | 2785 | 28.3  | 34.8  | 11.9  | 8.4   | 70.0  | 64.3  | 4.4E-07   |
|           |                 | ATV 861 | 2785 | 65.5  | 75.3  | 27.2  | 17.3  | 137.7 | 131.1 | 3.7E-04   |
|           |                 | IDV 861 | 2785 | 41.0  | 56.3  | 27.8  | 22.0  | 86.9  | 63.6  | 7.0E-06   |
|           |                 | LPV 861 | 2785 | 91.7  | 110.7 | 70.2  | 51.1  | 125.6 | 117.8 | 2.6E-07   |
|           |                 | NFV 861 | 2785 | 61.7  | 83.0  | 44.1  | 31.1  | 124.0 | 95.3  | 2.6E-07   |
|           |                 | RTV 861 | 2785 | 179.2 | 223.9 | 171.0 | 93.2  | 168.1 | 165.3 | 2.0E-10   |
|           |                 | SQV 861 | 2785 | 77.3  | 91.5  | 14.4  | 8.1   | 244.6 | 230.3 | 5.2E-08   |
|           |                 | TPV 543 | 1689 | 3.5   | 3.7   | 2.2   | 1.7   | 5.5   | 5.5   | 7.0E-03   |
| V82A/L90M | A431<br>(NC-p1) | APV 969 | 1165 | 42.8  | 41.1  | 13.6  | 15.8  | 81.6  | 78.3  | 1.0E+00   |
|           |                 | ATV 969 | 1165 | 101.4 | 84.0  | 35.5  | 42.4  | 141.8 | 163.4 | 1.0E+00   |
|           |                 | IDV 969 | 1165 | 52.9  | 61.6  | 34.6  | 28.2  | 82.1  | 77.4  | 4.5E-04   |
|           |                 | LPV 969 | 1165 | 115.2 | 121.4 | 81.4  | 68.0  | 130.1 | 134.3 | 5.1E-01   |
|           |                 | NFV 969 | 1165 | 88.4  | 94.7  | 55.4  | 53.1  | 122.9 | 121.1 | 1.0E+00   |
|           |                 | RTV 969 | 1165 | 264.7 | 233.3 | 192.9 | 400.0 | 160.9 | 160.5 | 1.3E-02   |
|           |                 | SQV 969 | 1165 | 122.9 | 97.9  | 19.6  | 21.4  | 249.1 | 281.8 | 1.0E+00   |
|           |                 | TPV 610 | 710  | 5.6   | 4.3   | 2.6   | 3.1   | 5.6   | 7.7   | 3.9E-02   |
| V82A/L90M | I437<br>(NC-p1) | APV 423 | 1653 | 48.4  | 40.7  | 19.7  | 13.2  | 85.5  | 79.7  | 3.7E-05   |
|           |                 | ATV 423 | 1651 | 130.1 | 82.0  | 59.5  | 34.2  | 187.1 | 141.0 | 3.3E-10   |
|           |                 | IDV 416 | 1639 | 75.1  | 52.5  | 39.8  | 29.4  | 99.6  | 74.1  | 3.5E-07   |
|           |                 | LPV 423 | 1653 | 147.6 | 111.1 | 98.8  | 68.7  | 151.9 | 128.4 | 5.2E-07   |
|           |                 | NFV 423 | 1653 | 120.0 | 82.6  | 69.8  | 50.2  | 151.8 | 111.5 | 2.4E-08   |
|           |                 | RTV 423 | 1653 | 284.1 | 238.0 | 400.0 | 230.2 | 154.9 | 162.3 | 3.9E-07   |
|           |                 | SQV 423 | 1653 | 284.1 | 238.0 | 400.0 | 230.2 | 154.9 | 162.3 | 3.9E-07   |
|           |                 | TPV 282 | 1005 | 6.9   | 4.5   | 3.9   | 2.5   | 9.1   | 6.2   | 1.8E-09   |
| V82A/L90M | L449<br>(p1-p6) | APV 200 | 1888 | 40.7  | 52.1  | 28.1  | 12.9  | 82.5  | 80.2  | 5.9E-06   |
|           |                 | ATV 200 | 1888 | 85.0  | 129.5 | 80.3  | 34.6  | 160.4 | 146.7 | 5.0E-09   |
|           |                 | IDV 200 | 1888 | 50.8  | 93.4  | 48.0  | 29.4  | 114.3 | 70.8  | 1.5E-09   |
|           |                 | LPV 200 | 1888 | 111.1 | 157.5 | 114.6 | 68.9  | 145.1 | 129.0 | 2.8E-08   |
|           |                 | NFV 200 | 1888 | 82.0  | 154.9 | 89.1  | 48.7  | 178.1 | 110.6 | <10.0E-12 |
|           |                 | RTV 200 | 1888 | 240.1 | 311.6 | 400.0 | 242.9 | 142.5 | 162.6 | 1.6E-06   |
|           |                 | SQV 200 | 1888 | 95.0  | 233.5 | 50.5  | 17.5  | 375.7 | 244.9 | <10.0E-12 |
|           |                 | TPV 127 | 1148 | 4.8   | 6.1   | 4.6   | 2.7   | 6.3   | 6.8   | 6.6E-03   |
| V82A/L90M | P453<br>(p1-p6) | APV 531 | 1482 | 40.8  | 43.9  | 17.7  | 13.0  | 78.0  | 81.2  | 5.5E-02   |
|           |                 | ATV 531 | 1482 | 89.2  | 94.8  | 42.4  | 36.5  | 154.9 | 148.3 | 1.0E+00   |
|           |                 | IDV 531 | 1482 | 52.6  | 68.7  | 34.9  | 29.9  | 96.7  | 72.8  | 1.4E-01   |
|           |                 | LPV 531 | 1482 | 112.3 | 132.9 | 86.0  | 68.7  | 137.2 | 130.7 | 1.8E-03   |
|           |                 | NFV 531 | 1482 | 85.2  | 107.6 | 60.0  | 51.7  | 144.1 | 112.6 | 3.5E-01   |
|           |                 | RTV 531 | 1482 | 238.1 | 276.8 | 400.0 | 228.5 | 155.1 | 162.8 | 5.9E-04   |
|           |                 | SQV 531 | 1482 | 107.8 | 121.9 | 25.9  | 18.0  | 276.7 | 264.3 | 3.3E-02   |
|           |                 | TPV 327 | 912  | 5.1   | 4.8   | 3.0   | 2.7   | 6.4   | 6.9   | 1.0E+00   |

|            |                 |     |      |      |       |       |       |       |       |       |           |
|------------|-----------------|-----|------|------|-------|-------|-------|-------|-------|-------|-----------|
| 184V       | A431<br>(NC-p1) | APV | 2157 | 1919 | 89.4  | 66.7  | 38.4  | 18.9  | 124.5 | 115.5 | <10.0E-12 |
|            |                 | ATV | 2157 | 1919 | 178.1 | 114.6 | 79.3  | 42.9  | 226.2 | 185.9 | <10.0E-12 |
|            |                 | IDV | 2157 | 1919 | 77.0  | 43.9  | 44.9  | 19.9  | 98.6  | 73.3  | <10.0E-12 |
|            |                 | LPV | 2157 | 1919 | 125.9 | 80.7  | 84.4  | 32.7  | 130.7 | 122.0 | <10.0E-12 |
|            |                 | NFV | 2157 | 1919 | 117.3 | 67.5  | 66.8  | 37.8  | 154.1 | 102.7 | <10.0E-12 |
|            |                 | RTV | 2157 | 1919 | 239.8 | 180.7 | 249.8 | 90.6  | 163.2 | 167.9 | <10.0E-12 |
|            |                 | SQV | 2157 | 1919 | 403.7 | 302.9 | 93.6  | 60.2  | 454.5 | 419.0 | 1.4E-12   |
|            |                 | TPV | 1515 | 1174 | 16.4  | 12.6  | 7.5   | 4.6   | 18.0  | 17.0  | <10.0E-12 |
| 184V       | K436<br>(NC-p1) | APV | 263  | 3907 | 110.8 | 75.9  | 36.1  | 28.3  | 148.9 | 118.2 | 3.7E-01   |
|            |                 | ATV | 263  | 3907 | 202.0 | 145.7 | 82.6  | 60.9  | 252.0 | 208.8 | 1.6E-01   |
|            |                 | IDV | 263  | 3907 | 79.3  | 60.5  | 39.3  | 31.7  | 107.9 | 88.2  | 1.0E+00   |
|            |                 | LPV | 263  | 3907 | 128.5 | 102.9 | 74.5  | 60.0  | 152.6 | 127.6 | 1.0E+00   |
|            |                 | NFV | 263  | 3907 | 125.5 | 92.4  | 58.5  | 51.2  | 171.0 | 133.4 | 1.0E+00   |
|            |                 | RTV | 263  | 3907 | 254.7 | 207.9 | 400.0 | 131.9 | 169.5 | 167.5 | 4.6E-02   |
|            |                 | SQV | 263  | 3907 | 357.9 | 355.3 | 67.8  | 74.1  | 446.7 | 440.5 | 1.0E+00   |
|            |                 | TPV | 185  | 2568 | 16.2  | 14.5  | 7.7   | 5.9   | 18.0  | 18.0  | 1.0E+00   |
| 184V       | I437<br>(NC-p1) | APV | 543  | 3673 | 99.1  | 74.8  | 43.8  | 26.5  | 130.7 | 118.7 | 3.0E-12   |
|            |                 | ATV | 543  | 3667 | 192.9 | 143.1 | 84.1  | 58.2  | 236.2 | 207.9 | 5.2E-11   |
|            |                 | IDV | 533  | 3636 | 84.3  | 58.3  | 40.6  | 30.9  | 112.2 | 84.9  | 1.4E-09   |
|            |                 | LPV | 543  | 3673 | 136.5 | 99.7  | 82.6  | 56.9  | 148.1 | 125.7 | <10.0E-12 |
|            |                 | NFV | 543  | 3673 | 118.2 | 92.0  | 66.6  | 50.4  | 154.2 | 135.0 | 1.2E-10   |
|            |                 | RTV | 543  | 3672 | 261.8 | 202.6 | 400.0 | 123.6 | 161.9 | 167.7 | <10.0E-12 |
|            |                 | SQV | 543  | 3673 | 413.8 | 345.8 | 93.3  | 71.0  | 459.0 | 437.3 | 8.7E-04   |
|            |                 | TPV | 392  | 2396 | 21.3  | 13.5  | 11.8  | 5.2   | 20.3  | 16.8  | <10.0E-12 |
| 184V       | R452<br>(p1-p6) | APV | 724  | 3413 | 92.3  | 75.6  | 39.8  | 26.5  | 127.7 | 119.4 | 3.1E-08   |
|            |                 | ATV | 724  | 3413 | 176.1 | 144.6 | 84.8  | 56.8  | 219.0 | 211.9 | 2.0E-10   |
|            |                 | IDV | 724  | 3413 | 81.9  | 57.9  | 46.2  | 30.3  | 103.6 | 86.6  | <10.0E-12 |
|            |                 | LPV | 724  | 3413 | 134.3 | 98.8  | 84.1  | 55.6  | 144.7 | 126.2 | <10.0E-12 |
|            |                 | NFV | 724  | 3413 | 128.8 | 88.6  | 68.5  | 49.1  | 164.9 | 130.6 | 0.0E+00   |
|            |                 | RTV | 724  | 3413 | 237.8 | 205.3 | 242.0 | 128.0 | 165.1 | 168.0 | 3.2E-05   |
|            |                 | SQV | 724  | 3413 | 466.5 | 329.2 | 132.8 | 65.2  | 464.1 | 431.5 | <10.0E-12 |
|            |                 | TPV | 504  | 2240 | 16.1  | 14.5  | 7.1   | 5.6   | 18.0  | 18.0  | 1.0E+00   |
| 184V       | P453<br>(p1-p6) | APV | 3264 | 780  | 81.4  | 68.3  | 31.2  | 24.1  | 122.8 | 112.4 | 2.6E-02   |
|            |                 | ATV | 3264 | 780  | 154.4 | 142.2 | 62.8  | 53.4  | 215.5 | 211.9 | 1.0E+00   |
|            |                 | IDV | 3264 | 780  | 63.9  | 57.7  | 33.3  | 29.8  | 92.5  | 86.4  | 1.0E+00   |
|            |                 | LPV | 3264 | 780  | 107.1 | 101.7 | 62.5  | 59.4  | 132.0 | 127.6 | 1.0E+00   |
|            |                 | NFV | 3264 | 780  | 101.7 | 78.3  | 55.1  | 41.8  | 143.5 | 124.0 | 3.2E-08   |
|            |                 | RTV | 3264 | 780  | 209.1 | 222.8 | 134.8 | 182.3 | 167.6 | 170.1 | 1.0E+00   |
|            |                 | SQV | 3264 | 780  | 372.6 | 276.0 | 82.0  | 48.2  | 445.1 | 409.7 | 3.9E-12   |
|            |                 | TPV | 2160 | 516  | 14.2  | 17.1  | 5.7   | 8.2   | 17.0  | 19.0  | 3.8E-01   |
| 184V/1.00M | A431            | APV | 1580 | 1427 | 98.4  | 76.0  | 42.0  | 22.6  | 131.1 | 123.7 | <10.0E-12 |
|            |                 | ATV | 1580 | 1427 | 205.6 | 131.3 | 103.8 | 54.7  | 263.4 | 195.6 | <10.0E-12 |
|            |                 | IDV | 1580 | 1427 | 90.0  | 51.0  | 53.4  | 24.6  | 105.6 | 77.5  | <10.0E-12 |
|            |                 | LPV | 1580 | 1427 | 136.5 | 91.7  | 92.7  | 40.3  | 135.1 | 129.6 | <10.0E-12 |

|           |                 |     |      |      |       |       |        |       |       |       |           |
|-----------|-----------------|-----|------|------|-------|-------|--------|-------|-------|-------|-----------|
| 184V/L90M | (NC-p1)         | NFV | 1580 | 1427 | 137.1 | 81.1  | 79.8   | 50.5  | 162.4 | 112.2 | <10.0E-12 |
|           |                 | RTV | 1580 | 1427 | 263.3 | 202.9 | 400.0  | 123.5 | 156.0 | 168.0 | <10.0E-12 |
|           |                 | SQV | 1580 | 1427 | 497.0 | 374.7 | 172.7  | 85.8  | 462.3 | 440.9 | <10.0E-12 |
|           |                 | TPV | 1090 | 857  | 16.1  | 12.4  | 7.7    | 4.7   | 18.0  | 16.0  | 5.6E-10   |
| 184V/L90M | K436<br>(NC-p1) | APV | 192  | 2898 | 126.7 | 84.1  | 39.9   | 32.7  | 159.0 | 125.0 | 1.0E+00   |
|           |                 | ATV | 192  | 2898 | 236.5 | 166.7 | 114.1  | 72.7  | 260.1 | 219.2 | 2.0E-02   |
|           |                 | IDV | 192  | 2898 | 91.5  | 70.0  | 51.8   | 38.8  | 110.1 | 93.9  | 1.3E-01   |
|           |                 | LPV | 192  | 2898 | 145.9 | 112.8 | 85.3   | 67.7  | 161.1 | 132.7 | 1.0E+00   |
|           |                 | NFV | 192  | 2898 | 152.9 | 108.3 | 86.1   | 64.0  | 182.9 | 142.0 | 6.1E-02   |
|           |                 | RTV | 192  | 2898 | 280.9 | 230.1 | 400.0  | 192.9 | 161.5 | 164.6 | 4.9E-02   |
|           |                 | SQV | 192  | 2898 | 448.2 | 435.1 | 110.6  | 115.1 | 464.5 | 455.5 | 1.0E+00   |
|           |                 | TPV | 134  | 1871 | 17.4  | 14.2  | 8.3    | 5.8   | 19.0  | 17.0  | 1.0E+00   |
| 184V/L90M | I437<br>(NC-p1) | APV | 381  | 2736 | 108.8 | 83.9  | 47.7   | 31.0  | 136.4 | 126.2 | 1.7E-08   |
|           |                 | ATV | 381  | 2732 | 220.9 | 164.7 | 107.5  | 71.0  | 246.4 | 218.1 | 3.0E-08   |
|           |                 | IDV | 375  | 2736 | 94.8  | 68.0  | 47.4   | 38.5  | 118.8 | 90.4  | 4.1E-05   |
|           |                 | LPV | 381  | 2736 | 140.4 | 111.3 | 88.5   | 65.4  | 145.7 | 132.6 | 2.4E-07   |
|           |                 | NFV | 381  | 2736 | 141.2 | 108.1 | 86.0   | 63.0  | 169.4 | 142.8 | 1.0E-07   |
|           |                 | RTV | 381  | 2735 | 284.1 | 225.7 | 400.0  | 177.2 | 153.3 | 165.3 | 8.3E-11   |
|           |                 | SQV | 381  | 2736 | 504.3 | 426.7 | 156.2  | 111.5 | 466.7 | 454.1 | 9.4E-03   |
|           |                 | TPV | 268  | 1758 | 19.1  | 13.5  | 10.2   | 5.5   | 19.3  | 16.8  | 2.2E-08   |
| 184V/L90M | R452<br>(p1-p6) | APV | 576  | 2479 | 96.6  | 85.9  | 42.8   | 31.4  | 131.1 | 127.8 | 2.9E-03   |
|           |                 | ATV | 576  | 2479 | 194.8 | 167.0 | 99.6   | 69.7  | 225.8 | 223.0 | 1.8E-05   |
|           |                 | IDV | 576  | 2479 | 92.0  | 67.3  | 54.6   | 37.0  | 108.0 | 92.0  | 8.8E-11   |
|           |                 | LPV | 576  | 2479 | 138.1 | 110.6 | 88.7   | 64.0  | 142.8 | 133.7 | 7.3E-08   |
|           |                 | NFV | 576  | 2479 | 143.9 | 105.4 | 81.8   | 62.8  | 171.5 | 139.8 | 2.3E-09   |
|           |                 | RTV | 576  | 2479 | 255.4 | 229.2 | 400.0  | 192.2 | 160.4 | 165.6 | 4.7E-02   |
|           |                 | SQV | 576  | 2479 | 546.8 | 408.3 | 1000.0 | 100.5 | 463.3 | 450.2 | 5.3E-10   |
|           |                 | TPV | 407  | 1587 | 15.8  | 14.2  | 6.9    | 5.7   | 18.0  | 17.0  | 1.0E+00   |
| 184V/L90M | P453<br>(p1-p6) | APV | 2505 | 501  | 89.3  | 81.5  | 34.1   | 29.0  | 129.2 | 123.7 | 1.0E+00   |
|           |                 | ATV | 2505 | 501  | 176.4 | 162.0 | 77.3   | 70.2  | 226.1 | 222.0 | 1.0E+00   |
|           |                 | IDV | 2505 | 501  | 73.6  | 67.7  | 40.4   | 36.9  | 98.3  | 93.3  | 1.0E+00   |
|           |                 | LPV | 2505 | 501  | 115.9 | 117.9 | 70.2   | 64.9  | 135.1 | 142.3 | 1.0E+00   |
|           |                 | NFV | 2505 | 501  | 116.7 | 98.4  | 66.6   | 57.4  | 151.0 | 139.5 | 1.3E-02   |
|           |                 | RTV | 2505 | 501  | 230.9 | 247.6 | 193.1  | 400.0 | 164.3 | 167.3 | 1.0E+00   |
|           |                 | SQV | 2505 | 501  | 446.0 | 364.3 | 123.4  | 71.2  | 456.6 | 443.1 | 4.4E-05   |
|           |                 | TPV | 1639 | 316  | 13.9  | 16.9  | 5.8    | 7.5   | 17.0  | 19.0  | 1.0E+00   |
| N88D      | A431<br>(NC-p1) | APV | 149  | 1085 | 14.1  | 5.1   | 3.0    | 1.1   | 37.5  | 28.5  | <10.0E-12 |
|           |                 | ATV | 149  | 1085 | 106.7 | 17.2  | 23.5   | 3.9   | 192.2 | 65.6  | <10.0E-12 |
|           |                 | IDV | 149  | 1085 | 27.3  | 5.8   | 7.0    | 2.1   | 61.0  | 25.5  | <10.0E-12 |
|           |                 | LPV | 149  | 1085 | 25.5  | 5.6   | 5.7    | 1.3   | 53.6  | 27.0  | <10.0E-12 |
|           |                 | NFV | 149  | 1085 | 293.0 | 109.0 | 157.9  | 57.5  | 243.5 | 154.9 | <10.0E-12 |
|           |                 | RTV | 149  | 1085 | 58.2  | 13.4  | 10.5   | 2.1   | 105.9 | 51.8  | <10.0E-12 |
|           |                 | SQV | 149  | 1085 | 185.0 | 30.2  | 10.9   | 2.8   | 354.3 | 141.6 | <10.0E-12 |
|           |                 | TPV | 92   | 554  | 5.1   | 1.9   | 1.7    | 0.9   | 11.0  | 5.4   | <10.0E-12 |

|           |                 |      |        |       |        |        |       |       |           |       |           |
|-----------|-----------------|------|--------|-------|--------|--------|-------|-------|-----------|-------|-----------|
| N88D      | A449<br>(p1-p6) | APV  | 365    | 824   | 8.26   | 4.96   | 1.46  | 1.15  | 33.1      | 25.7  | 1.8E-06   |
|           |                 | ATV  | 365    | 824   | 40.1   | 22.72  | 5.05  | 4.21  | 117.4     | 82.2  | 4.5E-02   |
|           |                 | IDV  | 365    | 824   | 11.89  | 6.51   | 2.72  | 2.17  | 39.9      | 26.1  | 1.3E-06   |
|           |                 | LPV  | 365    | 824   | 8.68   | 7.44   | 1.61  | 1.37  | 22.1      | 32.0  | 1.2E-01   |
|           |                 | NFV  | 365    | 824   | 164.59 | 119.52 | 76.04 | 59.48 | 201.1     | 168.8 | 3.6E-05   |
|           |                 | RTV  | 365    | 824   | 23.16  | 16.9   | 2.37  | 2.26  | 68.5      | 58.6  | 1.0E+00   |
|           |                 | SQV  | 365    | 824   | 76.19  | 39.72  | 3.85  | 2.84  | 237.3     | 168.4 | 1.7E-04   |
| N88D/L90M | A431<br>(NC-p1) | TPV  | 365    | 824   | 76.19  | 39.72  | 3.85  | 2.84  | 8.7       | 5.4   | 1.7E-04   |
|           |                 | APV  | 51     | 210   | 26.0   | 18.4   | 7.6   | 2.4   | 57.7      | 62.6  | 3.9E-04   |
|           |                 | ATV  | 51     | 210   | 217.9  | 46.1   | 81.9  | 13.4  | 252.5     | 104.1 | 1.5E-11   |
|           |                 | IDV  | 51     | 210   | 62.9   | 17.3   | 31.3  | 5.2   | 93.7      | 48.6  | 2.0E-11   |
|           |                 | LPV  | 51     | 210   | 48.7   | 20.1   | 31.4  | 4.0   | 73.1      | 56.7  | 2.1E-09   |
|           |                 | NFV  | 51     | 210   | 451.0  | 230.0  | 600.0 | 113.6 | 234.4     | 236.2 | 7.7E-05   |
|           |                 | RTV  | 51     | 210   | 139.0  | 53.1   | 93.1  | 15.7  | 138.7     | 101.6 | 7.0E-09   |
| L90M      | A431<br>(NC-p1) | SQV  | 51     | 210   | 471.0  | 125.0  | 177.2 | 24.8  | 451.9     | 279.7 | 2.7E-08   |
|           |                 | TPV  | 32     | 115   | 11.0   | 4.5    | 4.5   | 1.3   | 17.0      | 10.0  | 3.7E-04   |
|           |                 | APV  | 669    | 2486  | 44.1   | 17.2   | 14.67 | 1.7   | 85.3      | 58.7  | <10.0E-12 |
|           |                 | ATV  | 669    | 2486  | 77.76  | 25.62  | 28.76 | 3.04  | 140.7     | 81.0  | <10.0E-12 |
|           |                 | IDV  | 669    | 2486  | 78.48  | 16.52  | 37.8  | 3.6   | 107.4     | 47.9  | <10.0E-12 |
|           |                 | LPV  | 669    | 2486  | 108.87 | 25.56  | 62.7  | 1.77  | 136.1     | 75.2  | <10.0E-12 |
|           |                 | NFV  | 669    | 2486  | 114.55 | 29.7   | 55.56 | 10.08 | 155.6     | 73.8  | <10.0E-12 |
| RTV       | 669             | 2486 | 200.53 | 49.64 | 124.87 | 5.72   | 174.7 | 114.4 | <10.0E-12 |       |           |
| L90M      | A431<br>(NC-p1) | SQV  | 669    | 2486  | 79.98  | 26.4   | 14.3  | 3.14  | 225.4     | 126.3 | <10.0E-12 |
|           |                 | TPV  | 424    | 1396  | 10.31  | 4.59   | 4.08  | 1.26  | 15.0      | 10.0  | <10.0E-12 |

|      |                 |     |     |      |        |       |       |       |       |       |           |
|------|-----------------|-----|-----|------|--------|-------|-------|-------|-------|-------|-----------|
| L90M | K436<br>(NC-p1) | APV | 213 | 2884 | 44.8   | 20.88 | 7.2   | 2.01  | 96.2  | 62.3  | <10.0E-12 |
|      |                 | ATV | 213 | 2884 | 56.97  | 34.66 | 14.37 | 4.15  | 111.7 | 95.7  | <10.0E-12 |
|      |                 | IDV | 213 | 2884 | 47.38  | 27.8  | 17.16 | 4.81  | 84.5  | 67.7  | <10.0E-12 |
|      |                 | LPV | 213 | 2884 | 69.62  | 40.46 | 20.65 | 2.22  | 107.9 | 95.4  | <10.0E-12 |
|      |                 | NFV | 213 | 2884 | 63.37  | 45.94 | 29.69 | 13.17 | 104.0 | 100.9 | <10.0E-12 |
|      |                 | RTV | 213 | 2884 | 134.29 | 77.05 | 45.19 | 7.09  | 161.7 | 138.7 | <10.0E-12 |
|      |                 | SQV | 213 | 2884 | 56.83  | 35.48 | 9.96  | 3.7   | 189.3 | 149.6 | 4.1E-09   |
|      |                 | TPV | 138 | 1661 | 10.22  | 5.59  | 2.54  | 1.37  | 16.0  | 11.0  | 2.5E-06   |
| L90M | L449<br>(p1-p6) | APV | 328 | 2799 | 38.49  | 21.45 | 4.28  | 2.09  | 88.1  | 63.3  | 2.0E-04   |
|      |                 | ATV | 328 | 2799 | 69.05  | 33.06 | 8.48  | 4.54  | 147.0 | 90.3  | 8.0E-04   |
|      |                 | IDV | 328 | 2799 | 50.94  | 27.43 | 7.72  | 5.14  | 103.2 | 64.4  | 5.1E-02   |
|      |                 | LPV | 328 | 2799 | 69.26  | 40.93 | 4.16  | 2.46  | 133.1 | 93.6  | 1.0E-01   |
|      |                 | NFV | 328 | 2799 | 81.39  | 44.12 | 23.25 | 13.76 | 148.3 | 95.0  | 1.6E-06   |
|      |                 | RTV | 328 | 2799 | 115.37 | 78.65 | 12.57 | 7.77  | 165.1 | 138.6 | 2.8E-01   |
|      |                 | SQV | 328 | 2799 | 66.24  | 33.22 | 6.67  | 3.85  | 214.1 | 141.5 | 2.2E-04   |
|      |                 | TPV | 199 | 1612 | 6.97   | 5.86  | 1.79  | 1.45  | 12.0  | 12.0  | 1.0E+00   |
| L90M | S451<br>(p1-p6) | APV | 373 | 2695 | 17.61  | 23.61 | 2.8   | 2.15  | 47.9  | 67.9  | 1.0E+00   |
|      |                 | ATV | 373 | 2695 | 41.45  | 36.94 | 7.72  | 4.59  | 103.9 | 100.0 | 7.6E-03   |
|      |                 | IDV | 373 | 2695 | 34.59  | 29.71 | 6.75  | 5.21  | 83.2  | 69.3  | 4.7E-01   |
|      |                 | LPV | 373 | 2695 | 45.13  | 43.33 | 3.57  | 2.45  | 107.9 | 96.3  | 1.0E+00   |
|      |                 | NFV | 373 | 2695 | 53.35  | 47.84 | 16.66 | 14.08 | 106.8 | 103.4 | 3.2E-01   |
|      |                 | RTV | 373 | 2695 | 86.9   | 81.67 | 12.54 | 7.85  | 145.1 | 141.4 | 3.6E-01   |
|      |                 | SQV | 373 | 2695 | 28.79  | 37.95 | 5.66  | 3.94  | 105.8 | 156.6 | 1.2E-02   |
|      |                 | TPV | 210 | 1549 | 4.98   | 6.09  | 1.6   | 1.42  | 9.4   | 12.0  | 1.0E+00   |
| L90M | R452<br>(p1-p6) | APV | 53  | 3124 | 44.18  | 22.55 | 6.4   | 2.14  | 93.2  | 65.7  | 1.2E-01   |
|      |                 | ATV | 53  | 3124 | 64.34  | 36.16 | 13.17 | 4.66  | 139.5 | 97.1  | 3.3E-01   |
|      |                 | IDV | 53  | 3124 | 66.57  | 29.15 | 9.8   | 5.19  | 119.5 | 68.4  | 7.2E-01   |
|      |                 | LPV | 53  | 3124 | 80.87  | 42.65 | 14.14 | 2.52  | 138.5 | 96.1  | 6.1E-01   |
|      |                 | NFV | 53  | 3124 | 68.01  | 47.3  | 27.83 | 14.25 | 120.6 | 101.1 | 1.0E+00   |
|      |                 | RTV | 53  | 3124 | 146.54 | 80.7  | 37.2  | 8.02  | 178.5 | 140.7 | 7.9E-01   |
|      |                 | SQV | 53  | 3124 | 49.2   | 36.69 | 11.36 | 3.95  | 140.1 | 152.1 | 2.3E-02   |
|      |                 | TPV | 32  | 1808 | 8.53   | 5.85  | 3.39  | 1.44  | 11.0  | 11.0  | 1.0E+00   |
| L90M | P453<br>(p1-p6) | APV | 797 | 2127 | 38.45  | 16.64 | 3.86  | 1.94  | 90.5  | 50.5  | <10.0E-12 |
|      |                 | ATV | 797 | 2127 | 54.27  | 32.29 | 10.37 | 3.84  | 122.3 | 93.6  | <10.0E-12 |
|      |                 | IDV | 797 | 2127 | 40.71  | 27.49 | 8.49  | 4.79  | 84.8  | 67.2  | 3.7E-10   |
|      |                 | LPV | 797 | 2127 | 58.59  | 38.4  | 4.71  | 2.25  | 112.1 | 91.8  | 2.0E-09   |
|      |                 | NFV | 797 | 2127 | 70.62  | 41.41 | 21.44 | 12.58 | 132.1 | 92.0  | 0.0E+00   |
|      |                 | RTV | 797 | 2127 | 101.3  | 75.45 | 14.94 | 7.01  | 151.7 | 137.0 | 3.0E-08   |
|      |                 | SQV | 797 | 2127 | 53.7   | 33.83 | 7.05  | 3.37  | 180.4 | 149.8 | 0.0E+00   |
|      |                 | TPV | 502 | 1195 | 7.21   | 5.56  | 1.76  | 1.38  | 13.0  | 11.0  | 1.6E-02   |

P-P -- Samples with specified mutations present in both the protease and the cleavage site

P-A -- Samples with specified mutations present in the protease but absent the in cleavage site

p-values < 0.05 are significant
